# Supplementary material for: Au nanoparticles in alumina sols and coatings
Source: Royal Society of Chemistry journal article supplement (doi:10.1039/b802156b), 2008-01-01
Supplement: b802156b.pdf [file b802156b.pdf]

## Electronic supplementary information (ESI)

### Au Nanoparticles in Alumina Sols and Coatings

Goutam De\* and Siuli Bhattacharyya

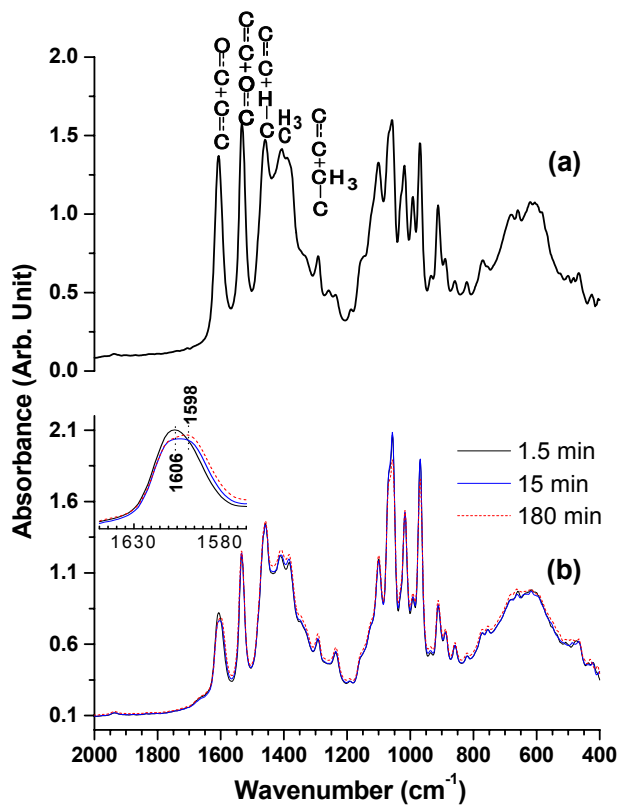

**Fig. S1.** FTIR spectra of (a) 1-propanol – 2-butanol solution of [Al(O-*s*-Bu)<sub>3-0.66</sub>(acac)<sub>0.66</sub>] (designated as ASB<sub>0.66acac</sub>), and (b) a representative ASB<sub>0.66acac</sub> solution after addition of equivalent amount of HAuCl<sub>4</sub> for obtaining 1 mol% Au-99% AlO<sub>1.5</sub> sol with respect to time. Inset shows spectra of 1650-1570 cm<sup>-1</sup> region in a magnified scale. FTIR of sols up to 5 mol% Au have also been recorded and found similar type of spectra.

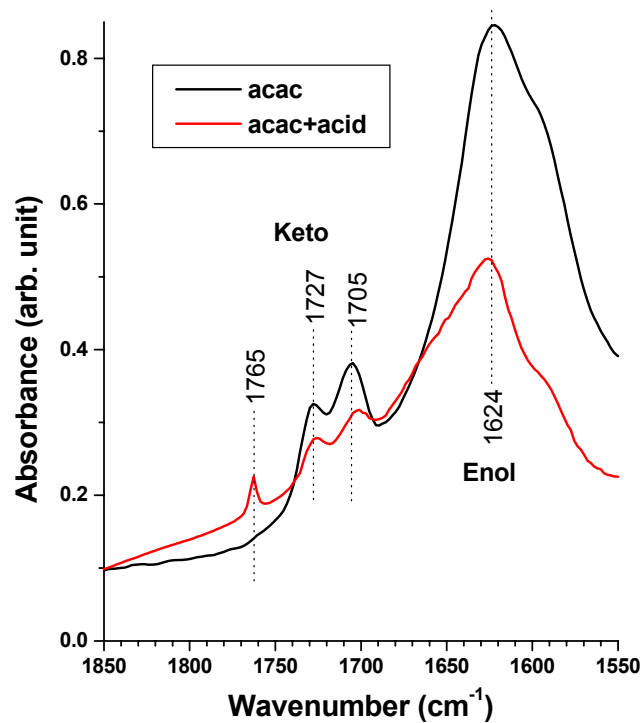

**Fig. S2.** FTIR spectra of acetylacetone (5 wt% in 1-propanol – 2-butanol mixture) and after addition of equimolar HNO<sub>3</sub> into it.

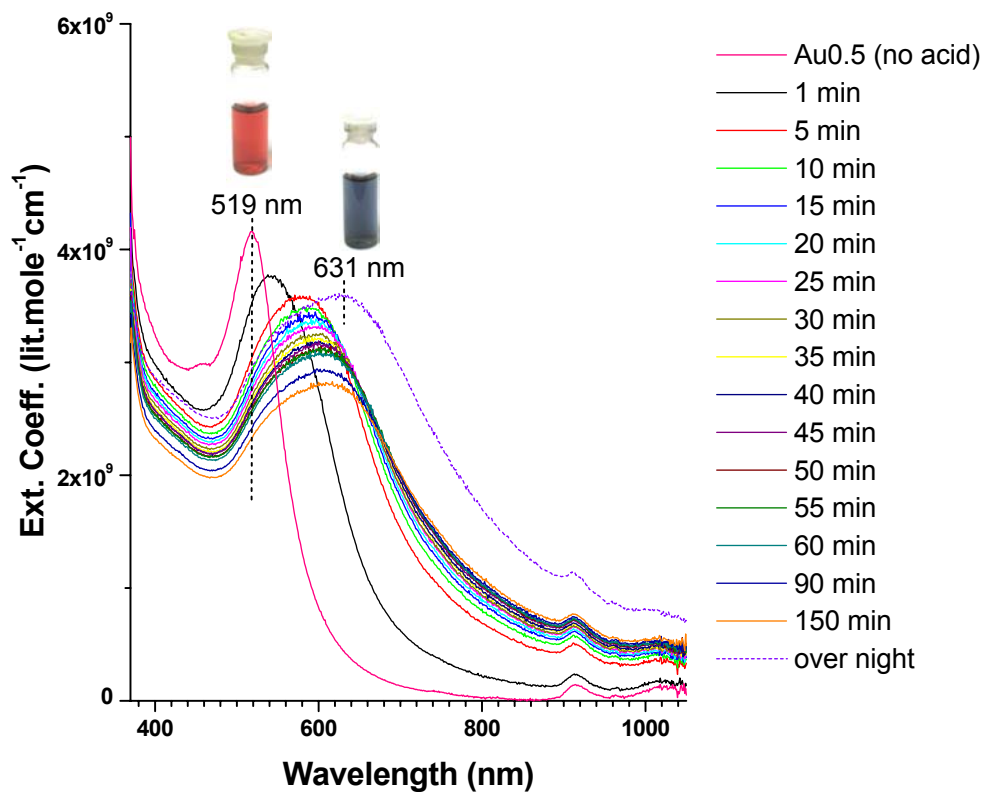

**Fig. S3.** Optical absorption spectral evolution of 0.5 mol% Au-99.5% AlO<sub>1.5</sub> sols (Au0.5) before and after addition of HNO<sub>3</sub> (1 mole H<sup>+</sup> per mole of Al) with respect to time. The first spectrum was recorded after 1 min of acid addition followed by as indicated in the body of the figure. The photographs of sols before acid addition and after end of reactions (over night / ~16 h) are also shown.
